# Supplementary material for: Static friction scaling of physisorbed islands: the key is in the edge
Source: Royal Society of Chemistry journal article supplement (doi:10.1039/c4nr06521b), 2014-12-12
Supplement: c4nr06521b3.pdf [file c4nr06521b3.pdf]

## Supplementary Information

### Static friction scaling: the key is in the edge

N. Varini<sup>1,2</sup>, A. Vanossi<sup>3,4</sup>, R. Guerra<sup>4,3</sup>, D. Mandelli<sup>4</sup>, R. Capozza<sup>4</sup>  
and E. Tosatti<sup>4,3,5</sup>

<sup>1</sup> *Research & Development, Curtin University, GPO Box U 1987, Perth 6845, Australia*

<sup>2</sup> *iVEC, 26 Dick Perry Avenue, Kensington WA 6151, Australia*

<sup>3</sup> *CNR-IOM Democritos National Simulation Center, Via Bonomea 265, 34136 Trieste, Italy*

<sup>4</sup> *International School for Advanced Studies (SISSA), Via Bonomea 265, 34136 Trieste, Italy*

<sup>5</sup> *International Center for Theoretical Physics (ICTP), Strada Costiera 11, 34104 Trieste, Italy*

November 26, 2014

## Model Parameters

The Kr-Pb interaction is modeled by the following Morse-modified potential:

$$V_{\text{Kr-Pb}} = \alpha(x, y) \left( e^{-2\beta(z-z_0)} - 2e^{\beta(z-z_0)} \right). \quad (1)$$

The function  $\alpha(x, y)$  in the Morse potential has the form

$$\alpha(x, y) = \alpha^{top} + M(x, y)(\alpha^{hollow} - \alpha^{top}), \quad (2)$$

with the on-top adhesion energy  $\alpha^{top} = 150$  meV and on-top equilibrium distance  $z_0 = 3.75$  Å [1], while  $\beta$  is obtained by equating the second derivative of the potential to the experimental spring-constant,

$$V''(z_0) = 2\alpha^{top}\beta^2 = \omega^2 m_{Kr}, \quad (3)$$

where  $m_{Kr}$  is the atomic mass of Krypton. With a perpendicular vibration energy of  $\hbar\omega \simeq 3$  meV [1], we obtain  $\beta = 0.775$  Å<sup>-1</sup>. The  $\alpha^{hollow}$  parameter is varied accordingly to the desired corrugation, and takes the value of 142.5 meV and 147 meV for the simulated corrugations of 5% and 2% of the on-top adhesion energy, respectively.

[1] J. L. F. Da Silva, C. Stampfl, and M. Scheffler, Phys. Rev. B **72**, 075424 (2005); J. L. F. DaSilva, PhD thesis: <http://hdl.handle.net/11858/00-001M-0000-0011-1371-0>

## Movie Captions

**Movie 1:** Depinning simulation of a Kr incommensurate hexagonal island ( $N = 269101$ ) adsorbed on Pb(111), at the static friction threshold. The Moiré interference patterns of the soliton network (enhanced for visibility, see Methods), and their evolution, highlight the depinning mechanism characterized by the entry of a soliton at the island left edge. At later times, when the center-of-mass sliding is about 1.5 lattice spacings, a soliton exits the island on the right hand side, with a caterpillar-like dynamics.

**Movie 2:** Simulation of a commensurate island with ad-hoc modified Xe-Xe Lennard-Jones interaction in order to make it commensurate to  $\sqrt{3} \times \sqrt{3}$  Cu(111) substrate at  $T = 50$  K (see Methods). Each atom is subject to a constant force of 1.7 meV/Å pointing along positive  $X$  axis. The system slides upon thermal appearance of the lattice dislocation nucleus at the island edge, followed by a subsequent force-driven expansion. Green, blue, and red colors indicate Xe atoms located on hollow, interstitial, and top Cu(111) sites, respectively.

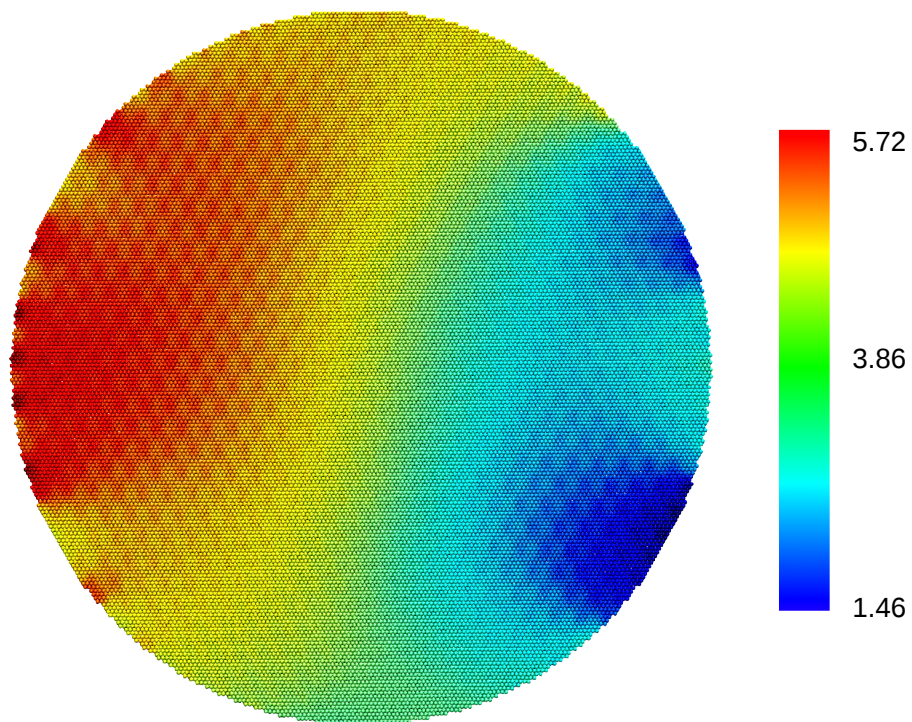

Figure 1: **Atomic displacement map before depinning.** The map shows the displacement of each atom of a circular island (diameter  $\simeq 40$  nm) under an applied force just below the static friction threshold with respect to the relaxed (zero applied force) state. The force is applied in the rightward direction. The color bar codes the displacement range in Angstrom.
